# Supplementary material for: Protein A-conjugated luminescent gold nanodots as a label-free assay for immunoglobulin G in plasma
Source: Royal Society of Chemistry journal article supplement (doi:10.1039/c0an00889c), 2011-01-01
Supplement: c0an00889c.pdf [file c0an00889c.pdf]

## *Supporting Information*

# Protein A–Conjugated Luminescent Gold Nanodots as a Label-Free Assay for Immunoglobulin G in Plasma

5 *Yen-Chun Shiang,<sup>†</sup> Che-An Lin,<sup>†</sup> Chih-Ching Huang<sup>‡,§,\*</sup> and Huan-Tsung Chang,<sup>†,\*</sup>*

<sup>†</sup>Department of Chemistry, National Taiwan University, Taipei, Taiwan <sup>‡</sup>Institute of Bioscience and  
Biotechnology and <sup>§</sup>Center for Marine Bioenvironment and Biotechnology (CMBB), National Taiwan  
Ocean University, Keelung, Taiwan

10 **E-mail:** [changht@ntu.edu.tw](mailto:changht@ntu.edu.tw)

**Correspondence:** Huan-Tsung Chang, Department of Chemistry, National Taiwan University, 1,  
Section 4, Roosevelt Road, Taipei, 10617, Taiwan; tel. and fax: 011-886-2-3366-1171; e-mail:  
[changht@ntu.edu.tw](mailto:changht@ntu.edu.tw); Chih-Ching Huang, Institute of Bioscience and Biotechnology and Center for  
15 Marine Bioenvironment and Biotechnology (CMBB), National Taiwan Ocean University, 2, Beining  
Road, Keelung, 20224, Taiwan; tel.: 011-886-2-2462-2192 ext 5517; fax: 011-886-2-2462-2320;  
e-mail: [huanging@ntou.edu.tw](mailto:huanging@ntou.edu.tw).

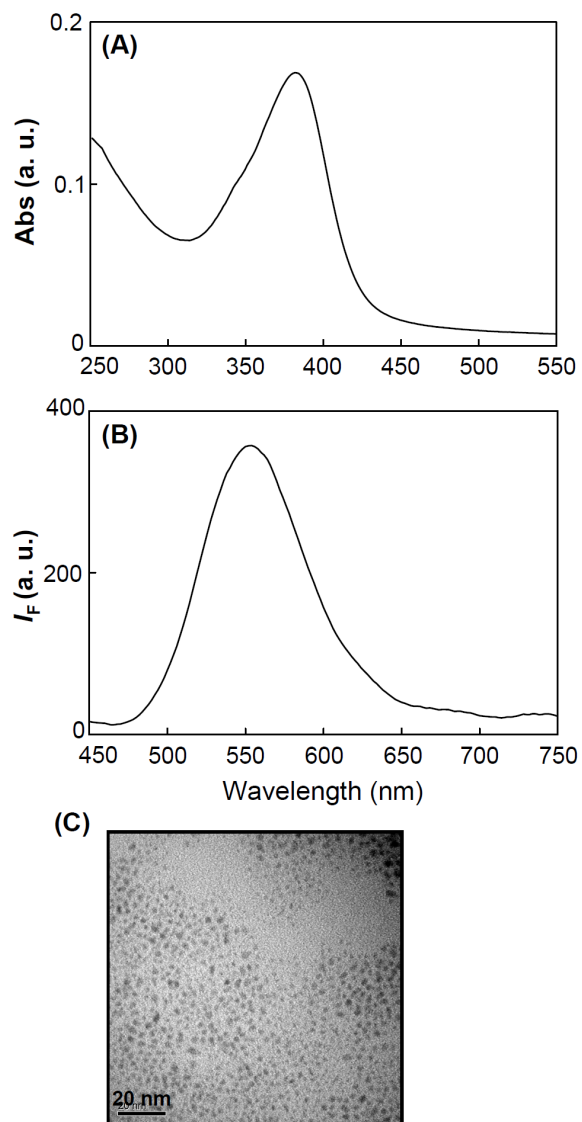

**Fig S1.** (A) Absorption spectrum, (B) luminescence spectrum and (C) TEM image of the 11-MUA-Au NDs.

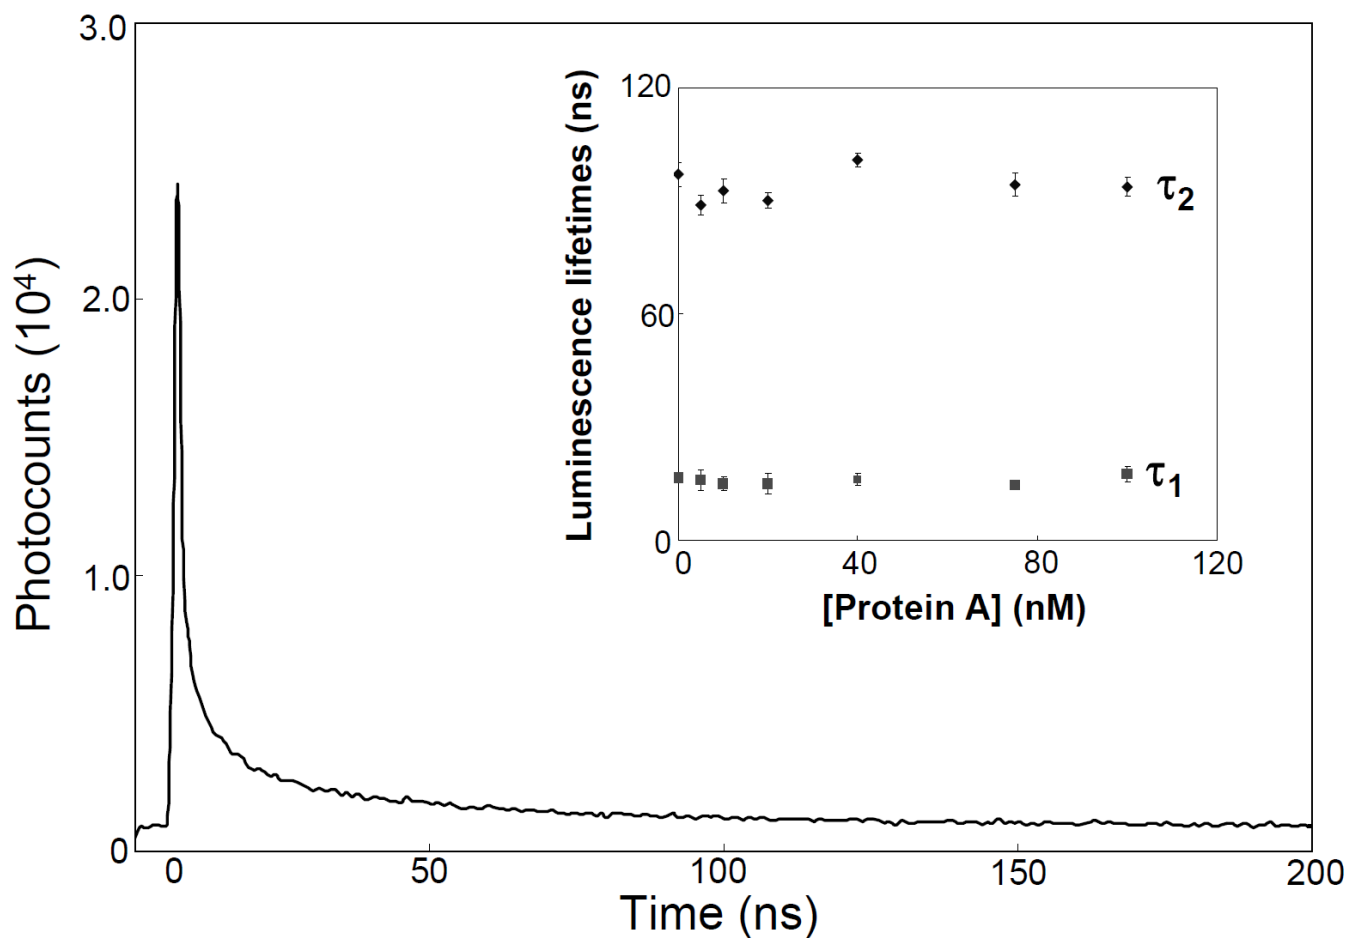

**Fig S2.** Photoluminescence decay of a representative set of PA-Au NDs; data were obtained after excitation at 375 nm. Inset: Plot of the photoluminescence lifetimes of the PA-Au NDs with respect to the concentration of protein A (0–100 nM). Error bars represent standard deviations from four 5 repeated experiments. The photoluminescence decay was fitted to a biexponential decay. Other conditions were the same as those described in Figure 1.

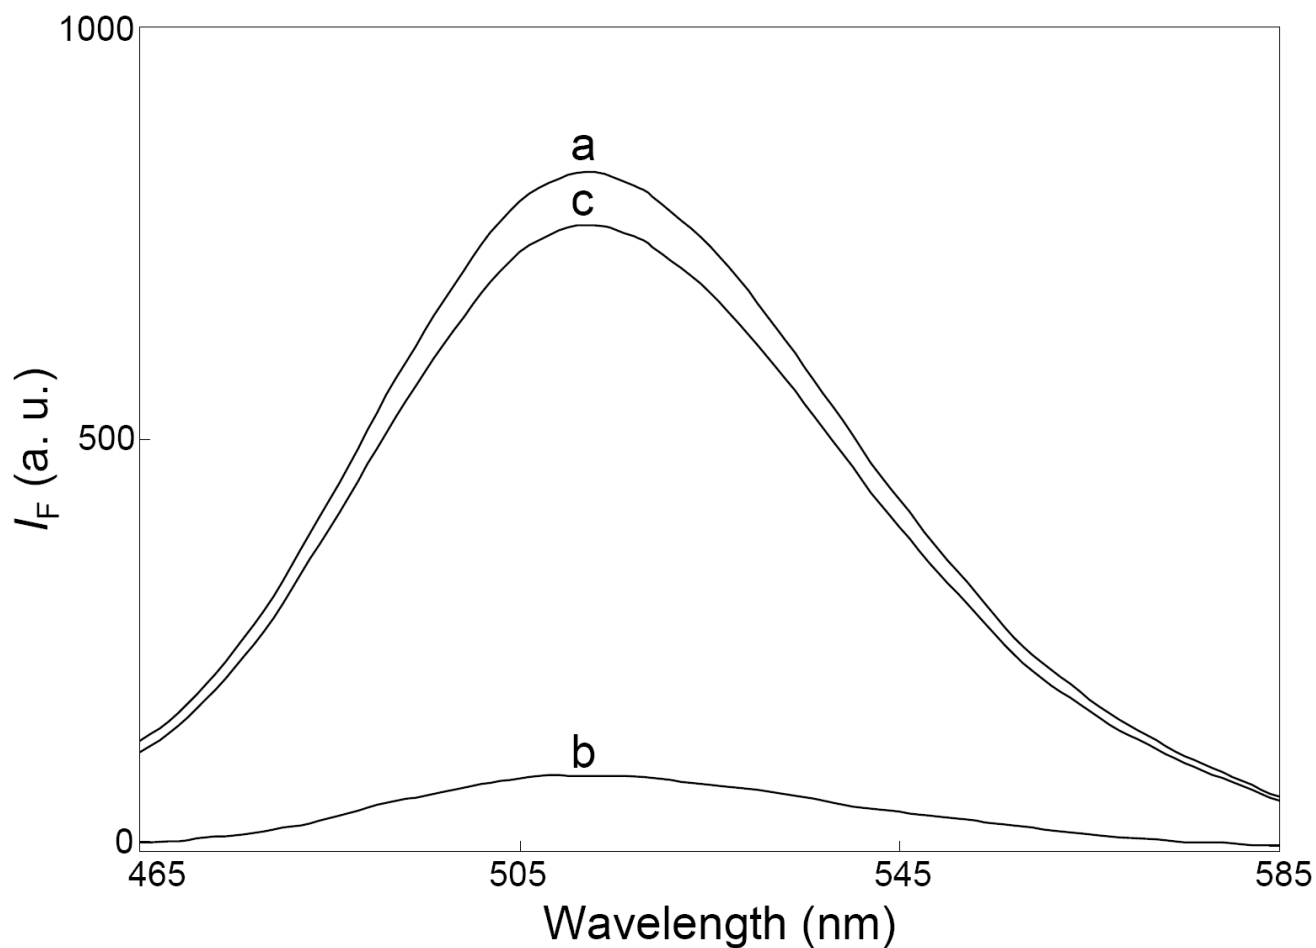

**Fig S3.** Luminescence spectra of solutions of (a) PA-Au NDs (10 nM), (b) the supernatant of the PA-Au ND (10 nM) solution in the presence of hIgG (500 nM) after centrifugation, and (c) the resuspended aggregates of the PA-Au NDs (10 nM) and hIgG (500 nM) after centrifugation. Other 5 conditions were the same as those described in Figure 2.

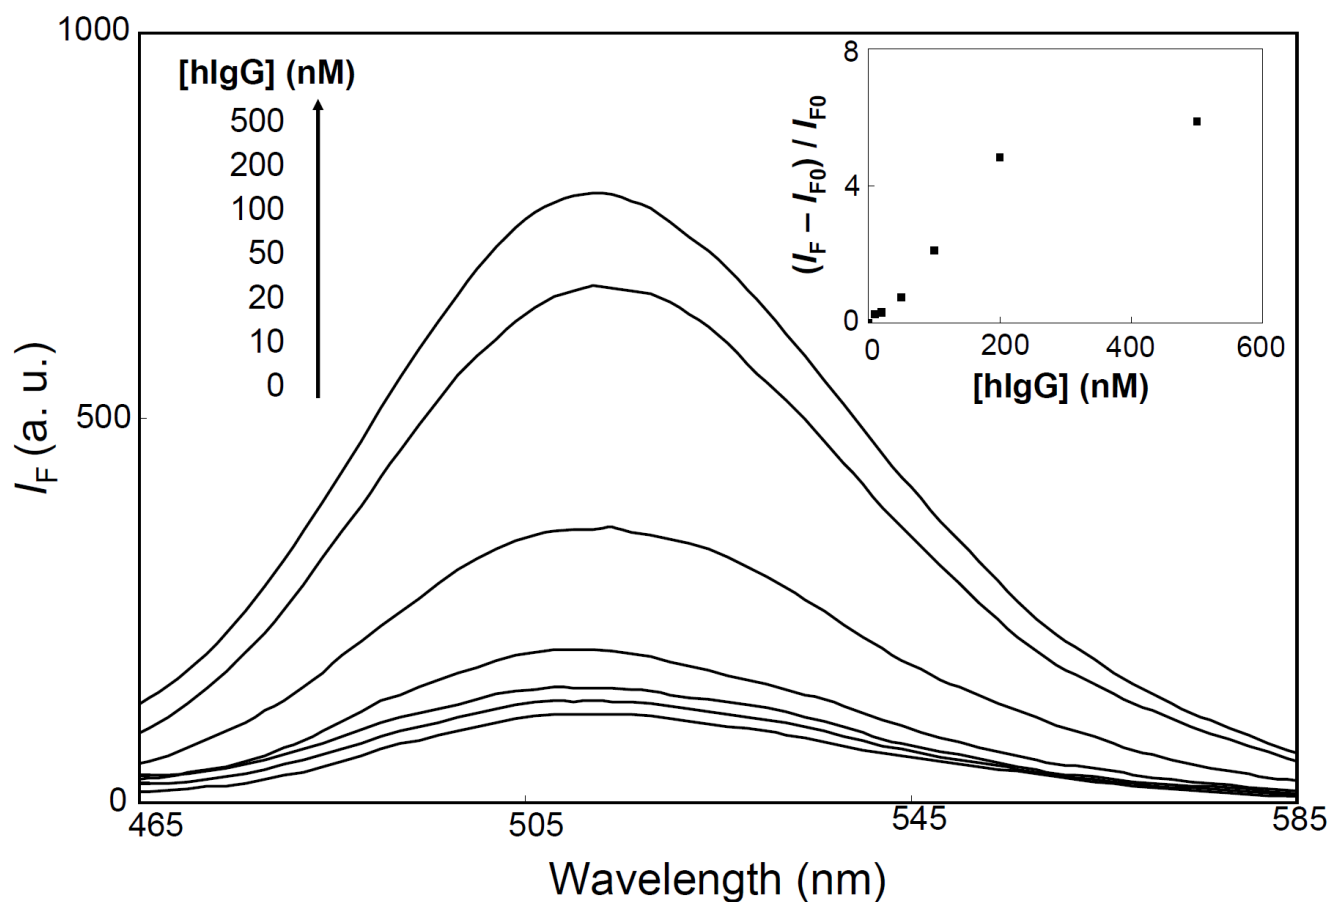

**Fig S4.** Luminescence spectra of the resuspended solution of PA-Au ND probe (10 nM) with various concentrations of hIgG (0–500 nM) in the presence of BSA (10 μM). Inset: Plot of the  $(I_F - I_{F0})/I_{F0}$  ratios of solutions of PA-Au ND probe. Other conditions were the same as those described in Figure

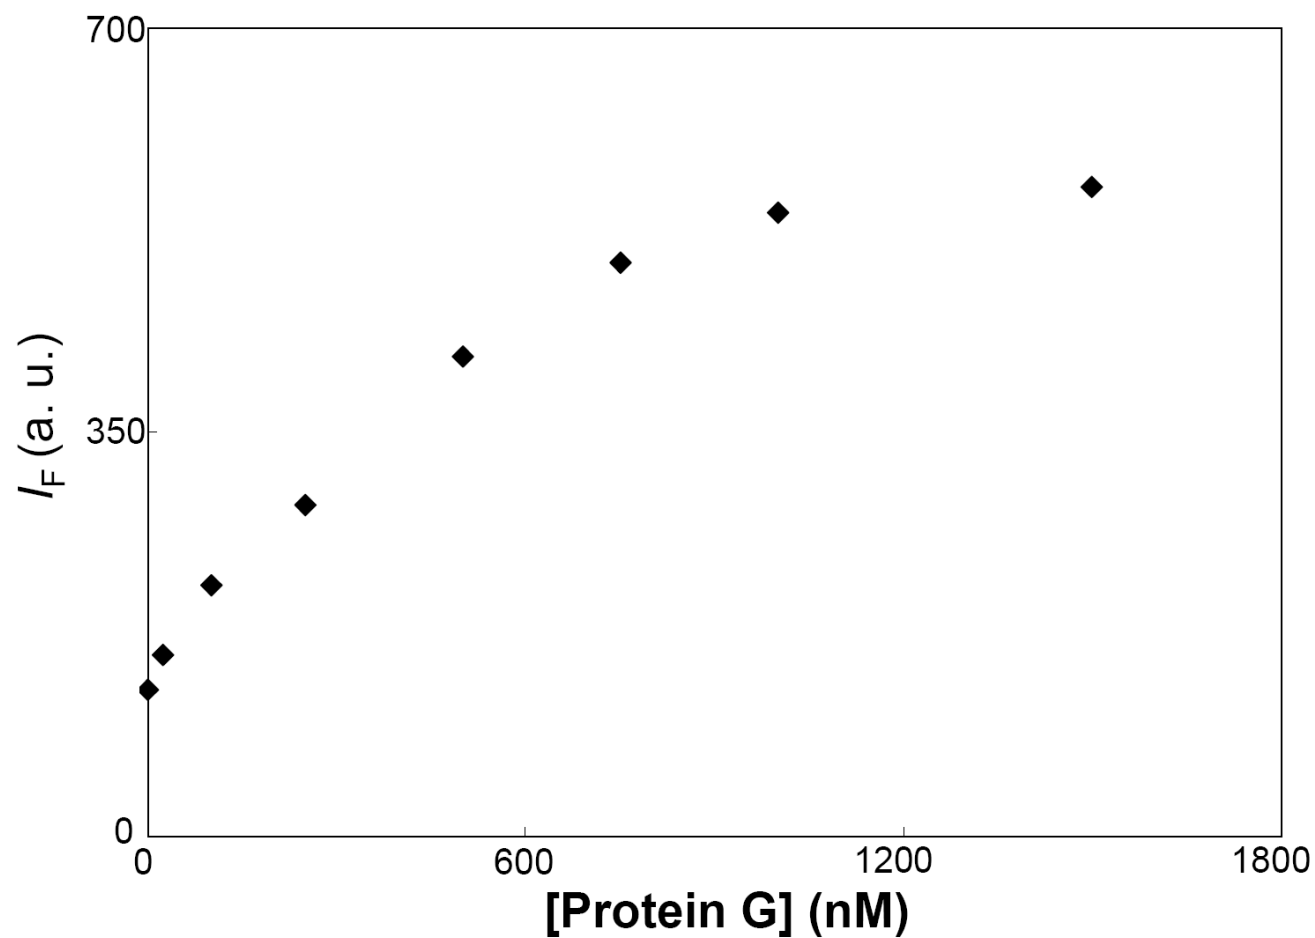

**Fig S5.** Luminescence intensities at 520 nm of sodium phosphate solutions (5 mM, pH 7.4) containing the PA-Au NDs (10 nM) and hIgG (500 nM), plotted against the concentration of protein G (0–1500 nM). Other conditions were the same as those described in Figure 2.

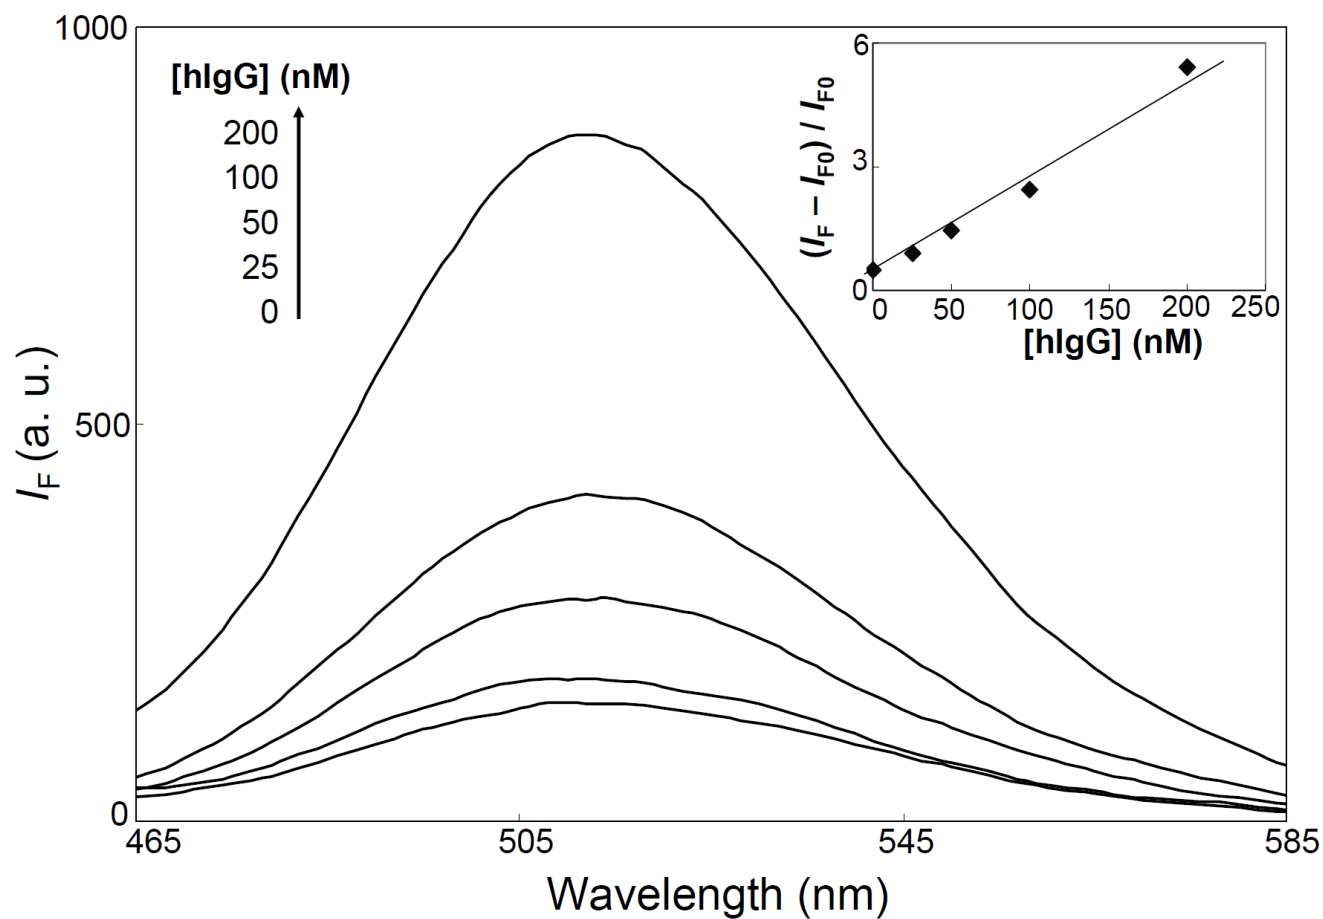

**Fig S6.** Luminescence spectra of the resuspended solution of PA-Au ND probe (10 nM) with various concentrations of hIgG (0–200 nM) spiked into aliquots of 400-fold-diluted plasma sample. Inset: Plot of the  $(I_F - I_{F0})/I_{F0}$  ratios of solutions of PA-Au ND probe. Other conditions were the same as those described in Figure 2.
